# Supplementary material for: Extra base hits: Widespread empirical support for instantaneous multiple-nucleotide changes
Source: PLOS journal article supplement (doi:10.1371/journal.pone.0248337), 2021-03-12
Supplement: S1 (10.1371/journal.pone.0248337.s001) [file journal.pone.0248337.s001]

S1 Table. Estimated  $\omega$  rate distributions for benchmark datasets for different models on the benchmark datasets.  $E[\omega]$ : the mean  $\omega$  value for the 1H model.  $\frac{E[\omega]:2H}{E[\omega]:1H}$ : the ratio of mean  $\omega$  estimates from 2H and 1H models.  $\frac{\delta:3H+}{\delta:2H}$ : the ratio of  $\delta$  estimates from 3H+ and 2H models. The datasets are sorted by increasing values of the  $\frac{E[\omega]:2H}{E[\omega]:1H}$  column. Genes where there was significant evidence (LRT  $p < 0.05$ ) of non-zero 2H rates are bolded, and those where there is evidence of non-zero 3H rates is underlined.

| Gene                             |             | 1H              |                 |                 |                                     | 2H              |                 |                 |                                | 3H+             |                 |                 |
|----------------------------------|-------------|-----------------|-----------------|-----------------|-------------------------------------|-----------------|-----------------|-----------------|--------------------------------|-----------------|-----------------|-----------------|
|                                  | $E[\omega]$ | $\omega_1(p_1)$ | $\omega_2(p_2)$ | $\omega_3(p_3)$ | $\frac{E[\omega]:2H}{E[\omega]:1H}$ | $\omega_1(p_1)$ | $\omega_2(p_2)$ | $\omega_3(p_3)$ | $\frac{\delta:3H+}{\delta:2H}$ | $\omega_1(p_1)$ | $\omega_2(p_2)$ | $\omega_3(p_3)$ |
| <b><math>\beta</math>-globin</b> | 0.28        | 0.0073 (32.4%)  | 0.28 (58.9%)    | 1.3 (8.66%)     | 0.6                                 | 0.00071 (28.4%) | 0.17 (61.5%)    | 0.64 (10.1%)    | 0.86                           | 0.0035 (30.2%)  | 0.19 (61.1%)    | 0.7 (8.68%)     |
| <b>Vertebrate Rhodopsin</b>      | 0.12        | 0.0097 (58.8%)  | 0.17 (30.3%)    | 0.54 (10.9%)    | 0.7                                 | 0.0085 (60.6%)  | 0.12 (29.6%)    | 0.4 (9.79%)     | 0.75                           | 0.0088 (60.6%)  | 0.13 (29.8%)    | 0.41 (9.63%)    |
| <b>Flavivirus NS5</b>            | 0.047       | 0.0026 (63.9%)  | 0.07 (26.5%)    | 0.28 (9.57%)    | 0.73                                | 0.0031 (67.1%)  | 0.062 (25.5%)   | 0.22 (7.4%)     | 0.68                           | 0.0031 (66.8%)  | 0.063 (25.7%)   | 0.22 (7.55%)    |
| <b>Drosophila adh</b>            | 0.1         | 0 (50.1%)       | 0.1 (33.8%)     | 0.43 (16%)      | 0.73                                | 0 (38.1%)       | 0.047 (42.5%)   | 0.29 (19.4%)    | 0.76                           | 0 (37.2%)       | 0.046 (43.2%)   | 0.29 (19.6%)    |
| <b>COXI</b>                      | 0.07        | 0.0027 (75.4%)  | 0.033 (17.3%)   | 0.14 (7.33%)    | 0.79                                | 0.0031 (79%)    | 0.035 (14%)     | 0.12 (6.99%)    | 1                              | 0.0031 (79.3%)  | 0.036 (13.9%)   | 0.12 (6.87%)    |
| <b>Sperm lysin</b>               | 1.1         | 0.11 (36.9%)    | 1.1 (41.7%)     | 2.9 (21.4%)     | 0.83                                | 0.096 (37.2%)   | 1 (43.8%)       | 2.5 (19%)       | 0.87                           | 0.1 (37.6%)     | 1 (43.7%)       | 2.4 (18.7%)     |
| <b>Hepatitis D virus antigen</b> | 0.48        | 0.033 (46.2%)   | 0.4 (32.4%)     | 1.6 (21.4%)     | 0.84                                | 0.038 (48.7%)   | 0.37 (30.2%)    | 1.3 (21.2%)     | 0.9                            | 0.037 (48.3%)   | 0.36 (29.9%)    | 1.3 (21.7%)     |
| <b>Camelid VHH</b>               | 0.95        | 0.12 (34%)      | 0.73 (40.8%)    | 2.5 (25.1%)     | 0.89                                | 0.1 (34.7%)     | 0.66 (40.4%)    | 2.2 (24.9%)     | 0.92                           | 0.1 (34.4%)     | 0.66 (40.2%)    | 2.2 (25.3%)     |
| <b>HIV-1 RT</b>                  | 0.19        | 0.016 (71.4%)   | 0.35 (22.2%)    | 1.6 (6.38%)     | 0.93                                | 0.015 (70.9%)   | 0.31 (22.3%)    | 1.5 (6.82%)     | 0.93                           | 0.015 (71.1%)   | 0.31 (22.2%)    | 1.5 (6.74%)     |
| <b>Encephalitis env</b>          | 0.054       | 0.024 (77.9%)   | 0.028 (15.5%)   | 0.48 (6.62%)    | 0.96                                | 0.023 (71.8%)   | 0.026 (21.6%)   | 0.46 (6.64%)    | 1                              | 0.023 (75.8%)   | 0.026 (17.6%)   | 0.46 (6.64%)    |
| <b>Influenza A virus HA</b>      | 0.47        | 0.095 (72%)     | 0.93 (23%)      | 3.7 (5.06%)     | 0.98                                | 0.097 (72.8%)   | 0.95 (22.6%)    | 3.7 (4.69%)     | 0.99                           | 0.098 (73.2%)   | 0.98 (22.4%)    | 3.8 (4.41%)     |
| <b>HIV-1 vif</b>                 | 0.84        | 0.14 (61.5%)    | 0.83 (20.6%)    | 3.2 (17.9%)     | 0.99                                | 0.16 (66.2%)    | 0.96 (16.4%)    | 3.2 (17.4%)     | 0.16                           | 0.16 (65.6%)    | 0.9 (16.2%)     | 3.2 (18.2%)     |
| <b>Primate Lysozyme</b>          | 0.61        | 0.14 (0%)       | 0.22 (82%)      | 2.4 (18%)       | 1                                   | 0.14 (0%)       | 0.22 (82%)      | 2.4 (18%)       | 1                              | 0.21 (16%)      | 0.22 (66%)      | 2.4 (18%)       |
